# Supplementary material for: Microbiome-based disease prediction with multimodal variational information bottlenecks
Source: PubMed Central journal article supplement (PMC9022840; doi:10.1371/journal.pcbi.1010050), 2022-04-11
Supplement: pcbi.1010050.s003.pdf [file pcbi.1010050.s003.pdf]

**S2 Table.** Comparison of different objective functions and pre-processing techniques.

| Dataset               | $J_{MVIB-T}$                   |                                | $J_{MVIB}$                     |                                |
|-----------------------|--------------------------------|--------------------------------|--------------------------------|--------------------------------|
|                       | D                              | J                              | D                              | J                              |
| IBD                   | 0.922<br>(0.020)               | <b>0.936</b><br><b>(0.014)</b> | 0.915<br>(0.018)               | 0.915<br>(0.018)               |
| EW-T2D                | <b>0.859</b><br><b>(0.023)</b> | 0.853<br>(0.025)               | 0.859<br>(0.024)               | 0.855<br>(0.027)               |
| C-T2D                 | 0.750<br>(0.009)               | <b>0.758</b><br><b>(0.012)</b> | 0.754<br>(0.014)               | 0.756<br>(0.015)               |
| Obesity               | 0.662<br>(0.024)               | 0.666<br>(0.027)               | <b>0.673</b><br><b>(0.028)</b> | 0.672<br>(0.030)               |
| Cirrhosis             | 0.925<br>(0.005)               | 0.924<br>(0.005)               | <b>0.930</b><br><b>(0.002)</b> | 0.928<br>(0.002)               |
| Colorectal            | 0.780<br>(0.071)               | 0.777<br>(0.069)               | 0.788<br>(0.059)               | <b>0.796</b><br><b>(0.055)</b> |
| Obesity-Joint         | 0.815<br>(0.019)               | 0.818<br>(0.018)               | 0.825<br>(0.019)               | <b>0.825</b><br><b>(0.018)</b> |
| Colorectal-EMBL       | 0.811<br>(0.010)               | 0.814<br>(0.013)               | 0.827<br>(0.012)               | <b>0.830</b><br><b>(0.011)</b> |
| Early-Colorectal-EMBL | 0.535<br>(0.050)               | <b>0.543</b><br><b>(0.048)</b> | 0.525<br>(0.051)               | 0.533<br>(0.053)               |
| Hypertension          | 0.602<br>(0.045)               | 0.608<br>(0.043)               | 0.622<br>(0.048)               | <b>0.624</b><br><b>(0.049)</b> |
