# Supplementary material for: Microbiome-based disease prediction with multimodal variational information bottlenecks
Source: PubMed Central journal article supplement (PMC9022840; doi:10.1371/journal.pcbi.1010050), 2022-04-11
Supplement: pcbi.1010050.s004.pdf [file pcbi.1010050.s004.pdf]

**S3 Table.** Comparison of pre-trained models against randomly initialised models.

| Dataset      | Random initialisation | Pre-trained model    |
|--------------|-----------------------|----------------------|
|              | J                     | J                    |
| IBD          | <b>0.936 (0.014)</b>  | 0.882 (0.021)        |
| EW-T2D       | <b>0.853 (0.025)</b>  | 0.780 (0.024)        |
| C-T2D        | 0.758 (0.012)         | <b>0.774 (0.013)</b> |
| Obesity      | 0.666 (0.027)         | <b>0.679 (0.024)</b> |
| Cirrhosis    | <b>0.924 (0.005)</b>  | 0.918 (0.007)        |
| Colorectal   | <b>0.777 (0.069)</b>  | 0.763 (0.068)        |
| Hypertension | 0.591 (0.041)         | <b>0.645 (0.047)</b> |
