# Supplementary material for: Microbiome-based disease prediction with multimodal variational information bottlenecks
Source: PubMed Central journal article supplement (PMC9022840; doi:10.1371/journal.pcbi.1010050), 2022-04-11
Supplement: pcbi.1010050.s005.pdf [file pcbi.1010050.s005.pdf]

**S4 Table. Experimental results for the Random Forest with default Scikit-learn implementation**

| Dataset               | Random Forest - Default Scikit-learn implementation (RF-DEF) |               |               |
|-----------------------|--------------------------------------------------------------|---------------|---------------|
|                       | A                                                            | M             | A+M           |
| IBD                   | 0.878 (0.038)                                                | 0.900 (0.018) | 0.878 (0.038) |
| EW-T2D                | 0.796 (0.027)                                                | 0.791 (0.041) | 0.796 (0.027) |
| C-T2D                 | 0.709 (0.022)                                                | 0.743 (0.017) | 0.709 (0.022) |
| Obesity               | 0.641 (0.026)                                                | 0.567 (0.016) | 0.641 (0.026) |
| Cirrhosis             | 0.890 (0.011)                                                | 0.894 (0.012) | 0.890 (0.011) |
| Colorectal            | 0.835 (0.038)                                                | 0.785 (0.043) | 0.835 (0.038) |
| Obesity-joint         | 0.798 (0.018)                                                | 0.768 (0.030) | 0.798 (0.018) |
| Colorectal-EMBL       | 0.866 (0.015)                                                | 0.822 (0.024) | 0.866 (0.015) |
| Early-Colorectal-EMBL | 0.517 (0.048)                                                | 0.521 (0.015) | 0.517 (0.048) |
| Hypertension          | 0.652 (0.043)                                                | 0.653 (0.025) | 0.652 (0.043) |

Experiments are executed five times with random independent training-test splits. Values in brackets refer to the standard error over the repeated experiments. Reported values are test ROC AUC.
